# Supplementary material for: Development of Self-Compressing BLSOM for Comprehensive Analysis of Big Sequence Data
Source: Hindawi journal article supplement (doi:10.1155/2015/506052), 2015-01-01
Supplement: f1 [file 506052.f1.pdf]

Supplementary Table S1. Numbers of Species and sequence fragments that were used in SC-BLSOM and BLSOM at Figure 2.

| Phylum                | Species# | sequence fragments# |
|-----------------------|----------|---------------------|
| Actinobacteria        | 91       | 10935               |
| Alphaproteobacteria   | 103      | 9921                |
| Aquificae             | 8        | 304                 |
| Bacteroidetes         | 31       | 2883                |
| Betaproteobacteria    | 63       | 8557                |
| Chlamydiae            | 8        | 622                 |
| Chlorobi              | 10       | 575                 |
| Chloroflexi           | 11       | 957                 |
| Crenarchaeota         | 23       | 1266                |
| Cyanobacteria         | 13       | 2700                |
| Deinococcus-Thermus   | 8        | 473                 |
| Deltaproteobacteria   | 32       | 3776                |
| Epsilonproteobacteria | 20       | 1724                |
| Euryarchaeota         | 58       | 2823                |
| Firmicutes            | 150      | 17219               |
| Fusobacteria          | 5        | 255                 |
| Gammaproteobacteria   | 139      | 24067               |
| Spirochaetes          | 17       | 1097                |
| Tenericutes           | 16       | 407                 |
| Thermotogae           | 11       | 437                 |
| Total                 | 817      | 90998               |

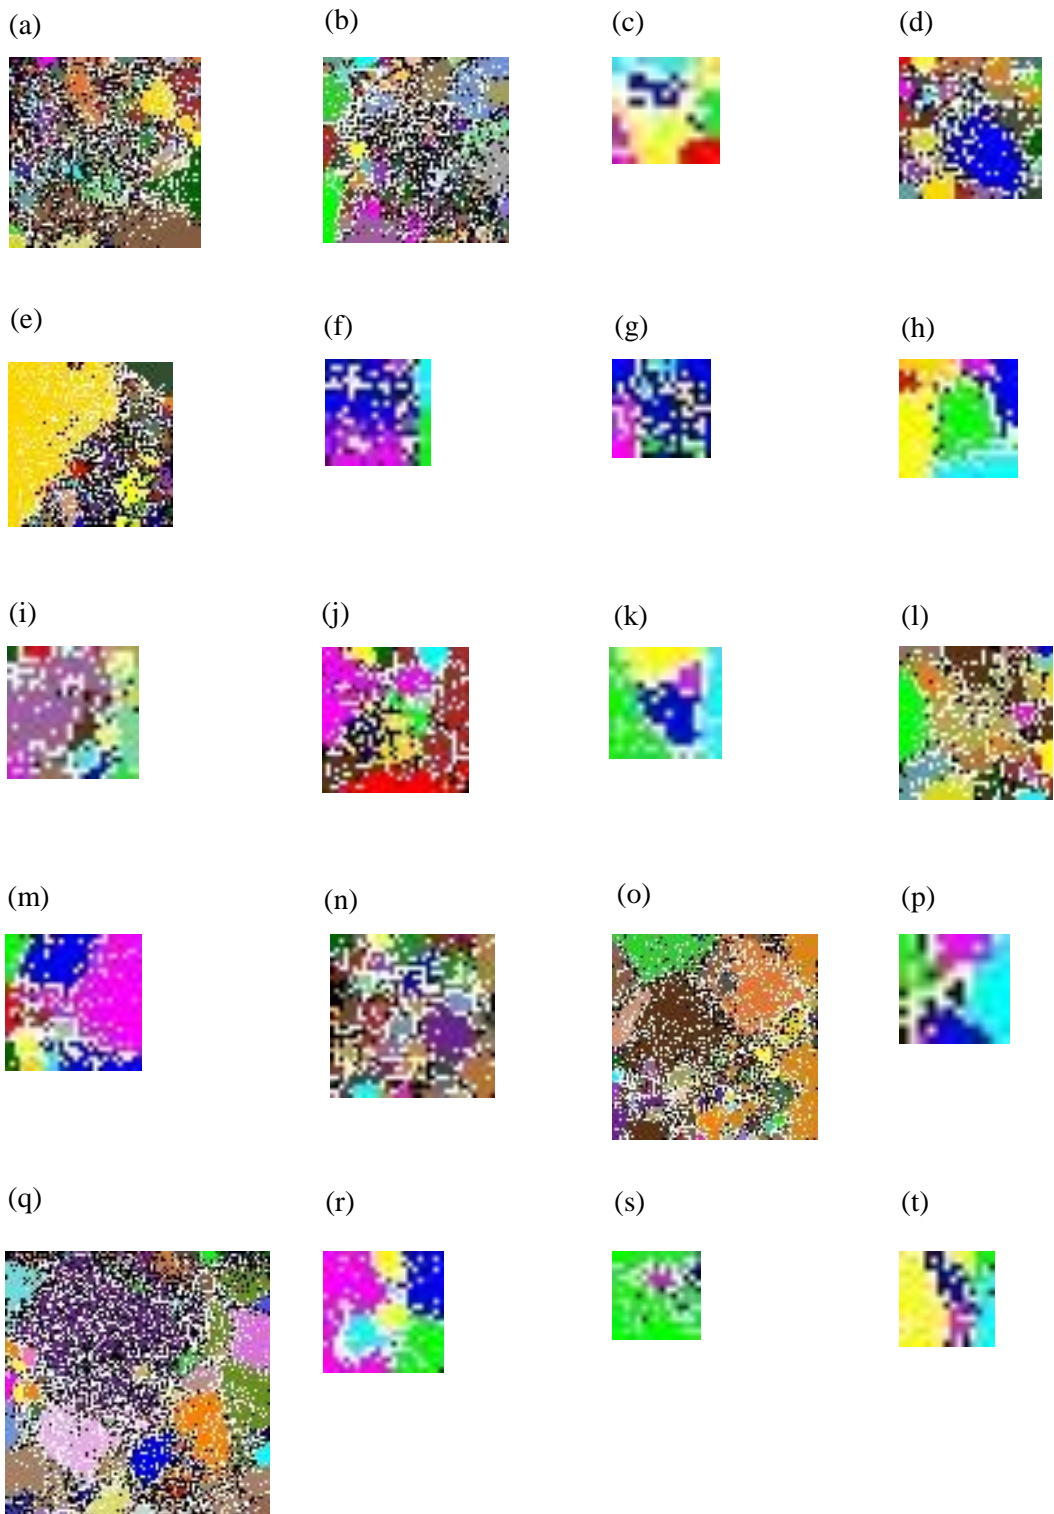

Supplementary Figure S1. BLSOM with DegeTetra in 5-Kb sequences from each phylum in the first layer. (a) Actinobacteria, (b) Alphaproteobacteria, (c) Aquificae, (d) Bacteroidetes, (e) Betaproteobacteria, (f) Chlamydiae, (g) Chlorobi, (h) Chloroflexi, (i) Crenarchaeota, (j) Cyanobacteria, (k) Deinococcus-Thermus, (l) Deltaproteobacteria, (m) Epsilonproteobacteria, (n) Firmicutes, (o) Firmicutes, (p) Fusobacteria, (q) Gammaproteobacteria, (r) Spirochaetes, (s) Tenericutes, (t) Thermotogae.
